# Supplementary material for: A bidirectional growth mechanism for a stable lithium anode by a platinum nanolayer sputtered on a polypropylene separator
Source: Royal Society of Chemistry journal article supplement (doi:10.1039/c8ra02140f), 2018-01-01
Supplement: c8ra02140f1.pdf [file c8ra02140f1.pdf]

Electronic Supplementary Information (ESI)

## **A Bidirectional Growth Mechanism for Stable Lithium Anode by Platinum Nanolayer Sputtered on Polypropylene Separator**

*Kaihua Wen,<sup>a,b</sup> Lili Liu,<sup>c</sup> Shimou Chen<sup>\*a</sup> and Suojiang Zhang,<sup>\*a</sup>*

<sup>a</sup>Beijing Key Laboratory of Ionic Liquids Clean Process, Key Laboratory of Green Process and Engineering, Institute of Process Engineering, Chinese Academy of Sciences, Beijing 100190, P. R. China.

<sup>b</sup>University of Chinese Academy of Sciences, Beijing 100049, P. R. China.

<sup>c</sup>Key Laboratory of Cosmetic, China National Light Industry, School of Science, Beijing Technology and Business University, Beijing 100048, China.

\*Corresponding author. E-mail: [chenshimou@ipe.ac.cn](mailto:chenshimou@ipe.ac.cn); [sjzhang@ipe.ac.cn](mailto:sjzhang@ipe.ac.cn).

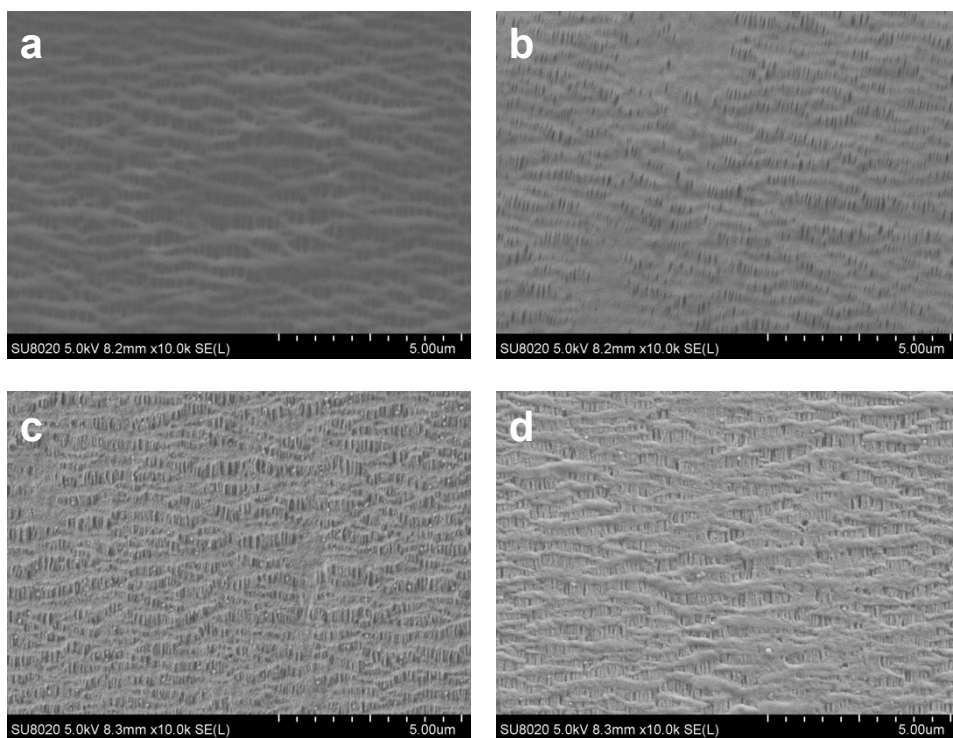

**Fig. S1** SEM images of PP separators different thickness of sputtered Pt layers. (a) 0 nm. (b) 25 nm. (c) 120 nm. (d) 250 nm.

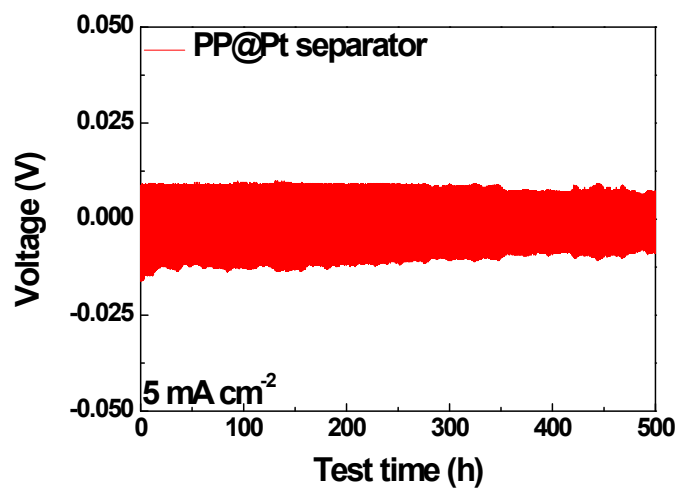

**Fig. S2** Galvanostatic cycling performance of Li|PP@Pt|Li cell at 5 mA cm<sup>-2</sup> at room temperature for 500 hours.

**Table S1** Resistances data of Li/Li cells using PP AND PP@Pt separators obtained by fitting the spectra to the equivalent circuit presented in Fig. 5b.

| Cycle number | $R_b$ (ohm $\text{cm}^{-2}$ ) |       | $R_{\text{int}}$ (ohm $\text{cm}^{-2}$ ) |       |
|--------------|-------------------------------|-------|------------------------------------------|-------|
|              | PP                            | PP@Pt | PP                                       | PP@Pt |
| 0            | 2.62                          | 1.87  | 292                                      | 167   |
| 10           | 1.85                          | 2.13  | 22.73                                    | 17.26 |
| 20           | 1.98                          | 2.25  | 19.02                                    | 13.96 |
| 30           | 2.32                          | 2.33  | 13.29                                    | 10.45 |
| 40           | 2.45                          | 2.20  | 13.42                                    | 7.01  |
| 50           | 2.38                          | 2.13  | 12.41                                    | 5.46  |
| 60           | 2.65                          | 2.33  | 12.21                                    | 4.59  |
| 70           | 2.72                          | 2.26  | 11.20                                    | 3.91  |
| 80           | 2.45                          | 2.18  | 14.03                                    | 4.26  |
| 90           | 2.85                          | 2.27  | 16.00                                    | 4.04  |
| 100          | 2.92                          | 2.15  | 18.89                                    | 3.28  |

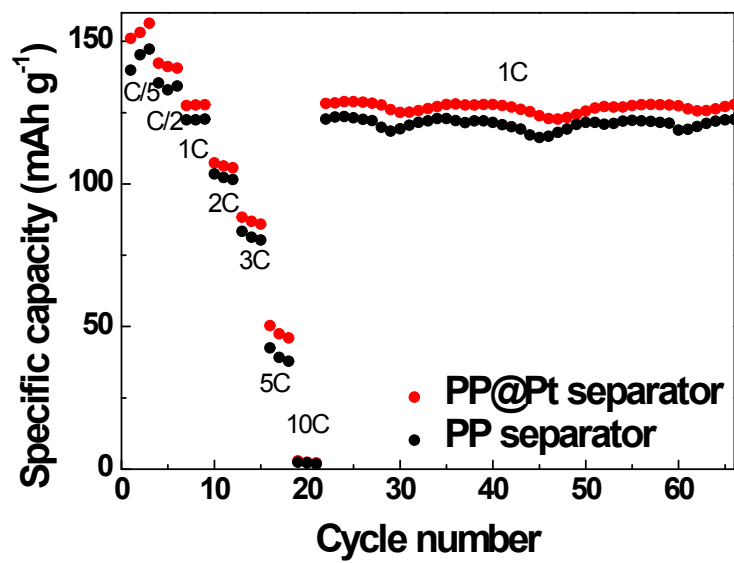

**Fig. S3** Galvanostatic cycling performance of Li/LiFePO<sub>4</sub> cells at different C-rates with PP@Pt separator (red) and PP separator (black).
